# Supplementary material for: Sequential Growth in Solution of NiFe Prussian Blue coordination network nanolayers on Si(100) surfaces
Source: Royal Society of Chemistry journal article supplement (doi:10.1039/c1dt11568e), 2011-12-09
Supplement: c1dt11568e.pdf [file c1dt11568e.pdf]

## Electronic Supporting Information

### Sequential Growth in Solution of NiFe Prussian Blue Coordination Network Nanolayers on Si(100) Surfaces

Simon Tricard,<sup>a,\*</sup> Claire Costa-Coquelard,<sup>a</sup> Florence Volatron,<sup>a</sup> Benoît Fleury,<sup>a</sup> Vincent Huc,<sup>a</sup> Pierre-Antoine Albouy,<sup>b</sup> Christophe David,<sup>c</sup> Frédéric Miserque,<sup>d</sup> Pascale Jegou,<sup>e</sup> Serge Palacin<sup>e</sup> and Talal Mallah<sup>a,\*</sup>

**Figure S1** Infrared spectra of the CN groups of the precursor  $K_4[Fe(CN)_6] \cdot 3H_2O$  ( $2042\text{ cm}^{-1}$ ) and the bulk material  $Ni_2[Fe(CN)_6] \cdot 12H_2O$  ( $2097\text{ cm}^{-1}$ ). The absorption is reported to one atom of iron by dividing by the molar mass of each compound. The molar absorption coefficient is found 30% lower for the binding cyanides of the bulk material than for the non binding ones of the ferrocyanide.

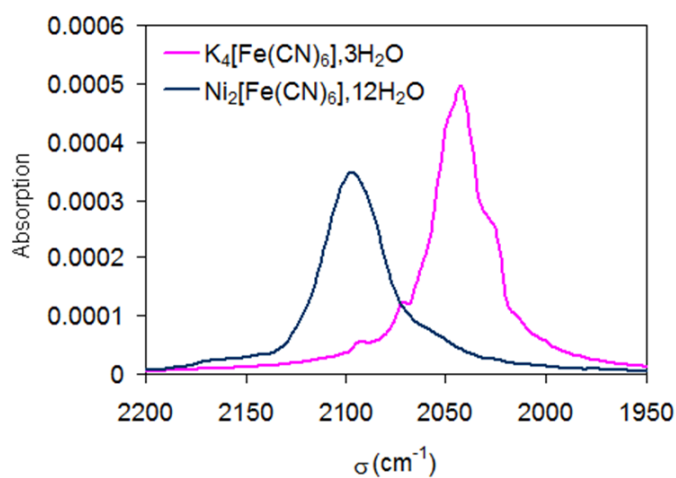

**Figure S2** Infrared spectra for the acid, ligand, and *NiO* formation of the synthesis of the anchoring monolayer. For the three reactions, we observed the C-H symmetrical and asymmetrical stretching bands of the aliphatic chains at 2883 and 2928  $\text{cm}^{-1}$  and the band centred at 2100  $\text{cm}^{-1}$  corresponding to unreacted Si-H. At the acid step, we observed the acid C=O stretching mode at 1719  $\text{cm}^{-1}$  that disappeared at the next steps (ligand and *NiO*) to give an amid C=O stretching mode at 1655  $\text{cm}^{-1}$ . We did not observe any significant differences in IR between the ligand and the *NiO* steps.

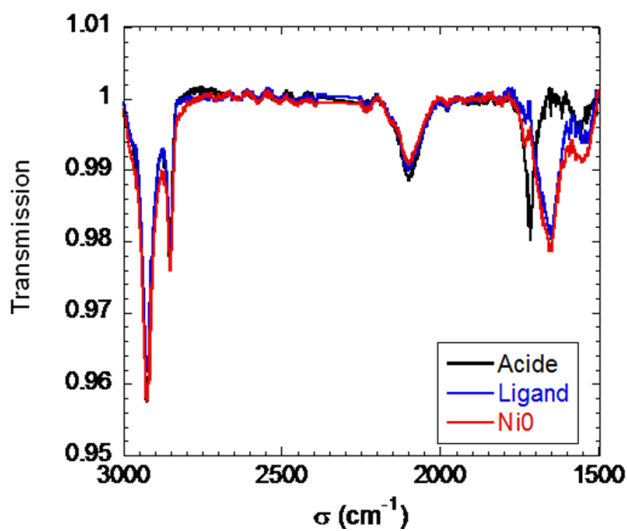

**Figure S3** X-ray reflectograms (dots) and simulation (line) a) for the acid step – simulated by a 1.2 nm thick slab; and b) for the *NiO* step of the formation of the anchoring monolayer – simulated by a 1.8 nm thick slab.

a)

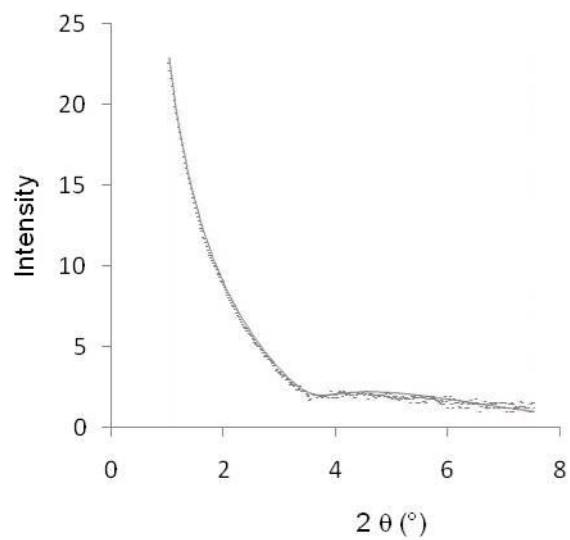

b)

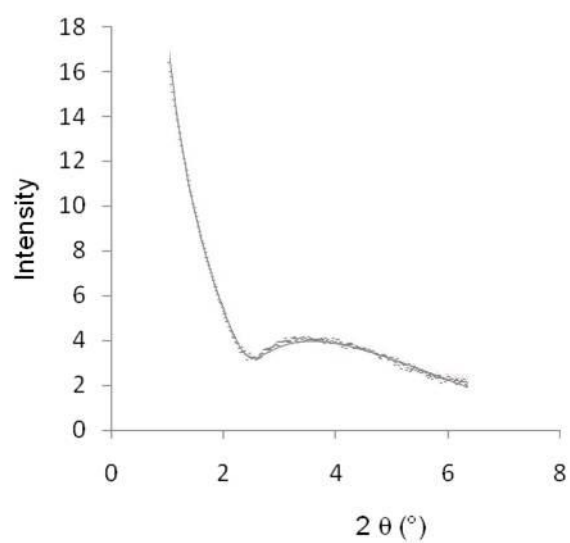

**Figure S4** AFM images of the SiH, acid and NiO steps of the formation of the anchoring monolayer: a) SiH step, roughness: 0.17 nm, b) acid step, roughness: 0.28 nm, b) NiO step, roughness: 0.28 nm. The blue lines represent the cross section close to the image.

a)

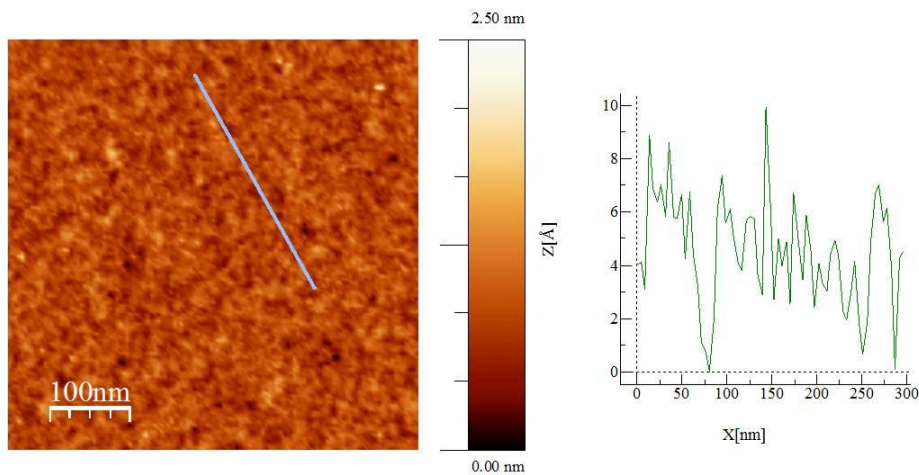

b)

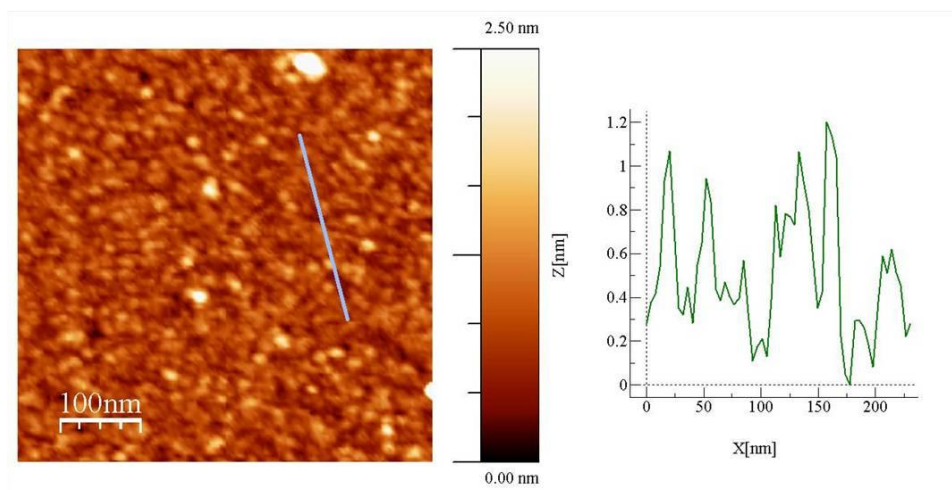

c)

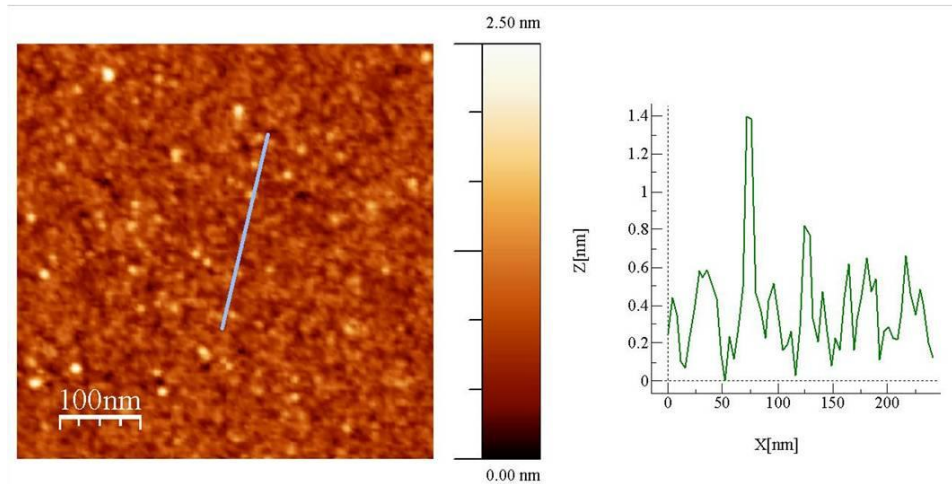

**Figure S5** XPS spectra at the N1s and Ni2p edges at the step *Ni0*. The ratio N/Ni extracted with these spectra was equal to 4.

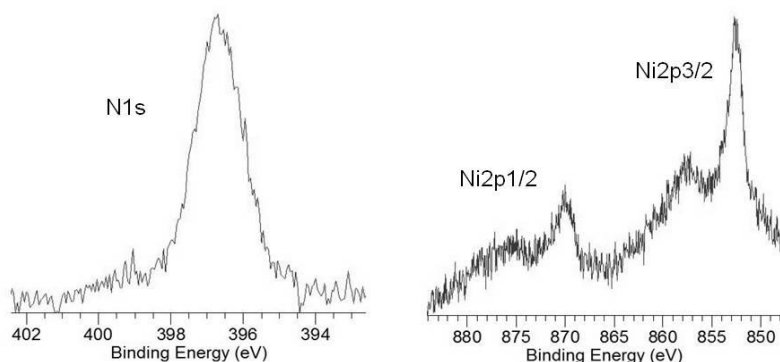

**Figure S6** Infra-red spectra at  $10^{-3}$  mol.L $^{-1}$ : zoom of the IR signal of the first two steps showing a shift from 2060 to 2069  $\text{cm}^{-1}$  (left); evolution of the IR signal at the *Nin* steps showing a shift from 2069 to 2096  $\text{cm}^{-1}$  (right).

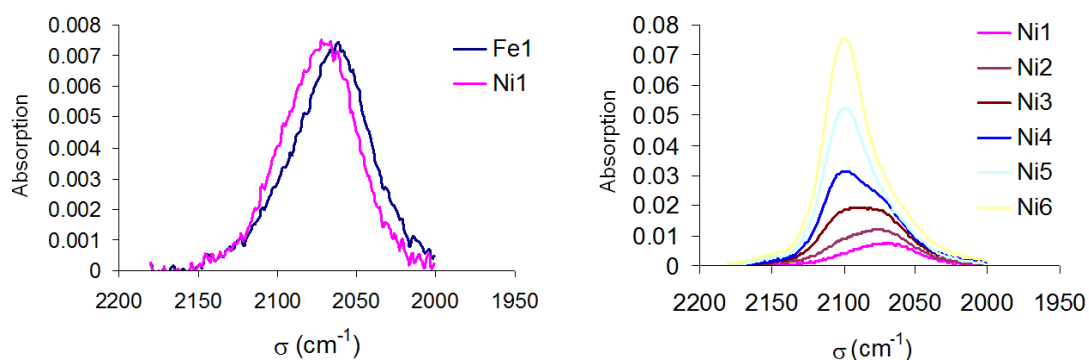

**Figure S7** X-ray reflectograms (dots) and simulation (line) at the step *Ni6* of Ni-Fe growth for a concentration of the precursors in solution of  $10^{-3}$  mol.L $^{-1}$  (left – simulated by a 1.8 nm thick slab and a 6.7 nm thick slab) and  $10^{-6}$  mol.L $^{-1}$  (right – simulated by a 1.8 nm thick slab and a 0.4 nm thick slab) and.

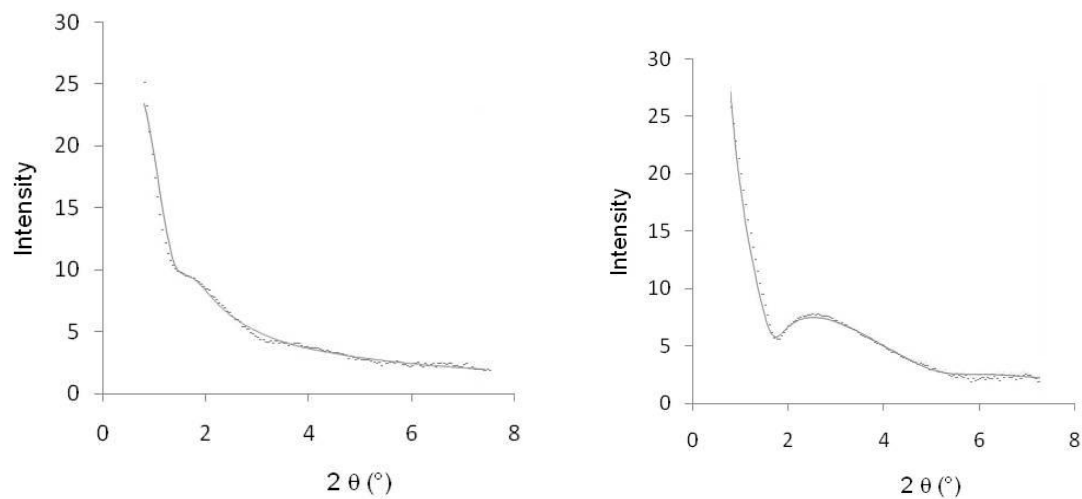

**Figure S8** a) XPS spectra at the Fe2p threshold for the starting material  $K_4Fe(CN)_6$  (left) and for the bulk compounds  $Ni_2[Fe(CN)_6]$  (center) and  $K_2Ni_3[Fe(CN)_6]_2$  (right). b) XPS spectra at the Ni2p threshold for the starting material  $K_4Fe(CN)_6$  (left) and for the bulk compounds  $Ni_2[Fe(CN)_6]$  (center) and  $K_2Ni_3[Fe(CN)_6]_2$  (right). c) XPS spectra at the Fe2p and Ni2p edges at the step *Ni6* of NiFe growth for a concentration of the precursors in solution of:  $10^{-6} \text{ mol.L}^{-1}$  (left);  $10^{-3} \text{ mol.L}^{-1}$  (right).

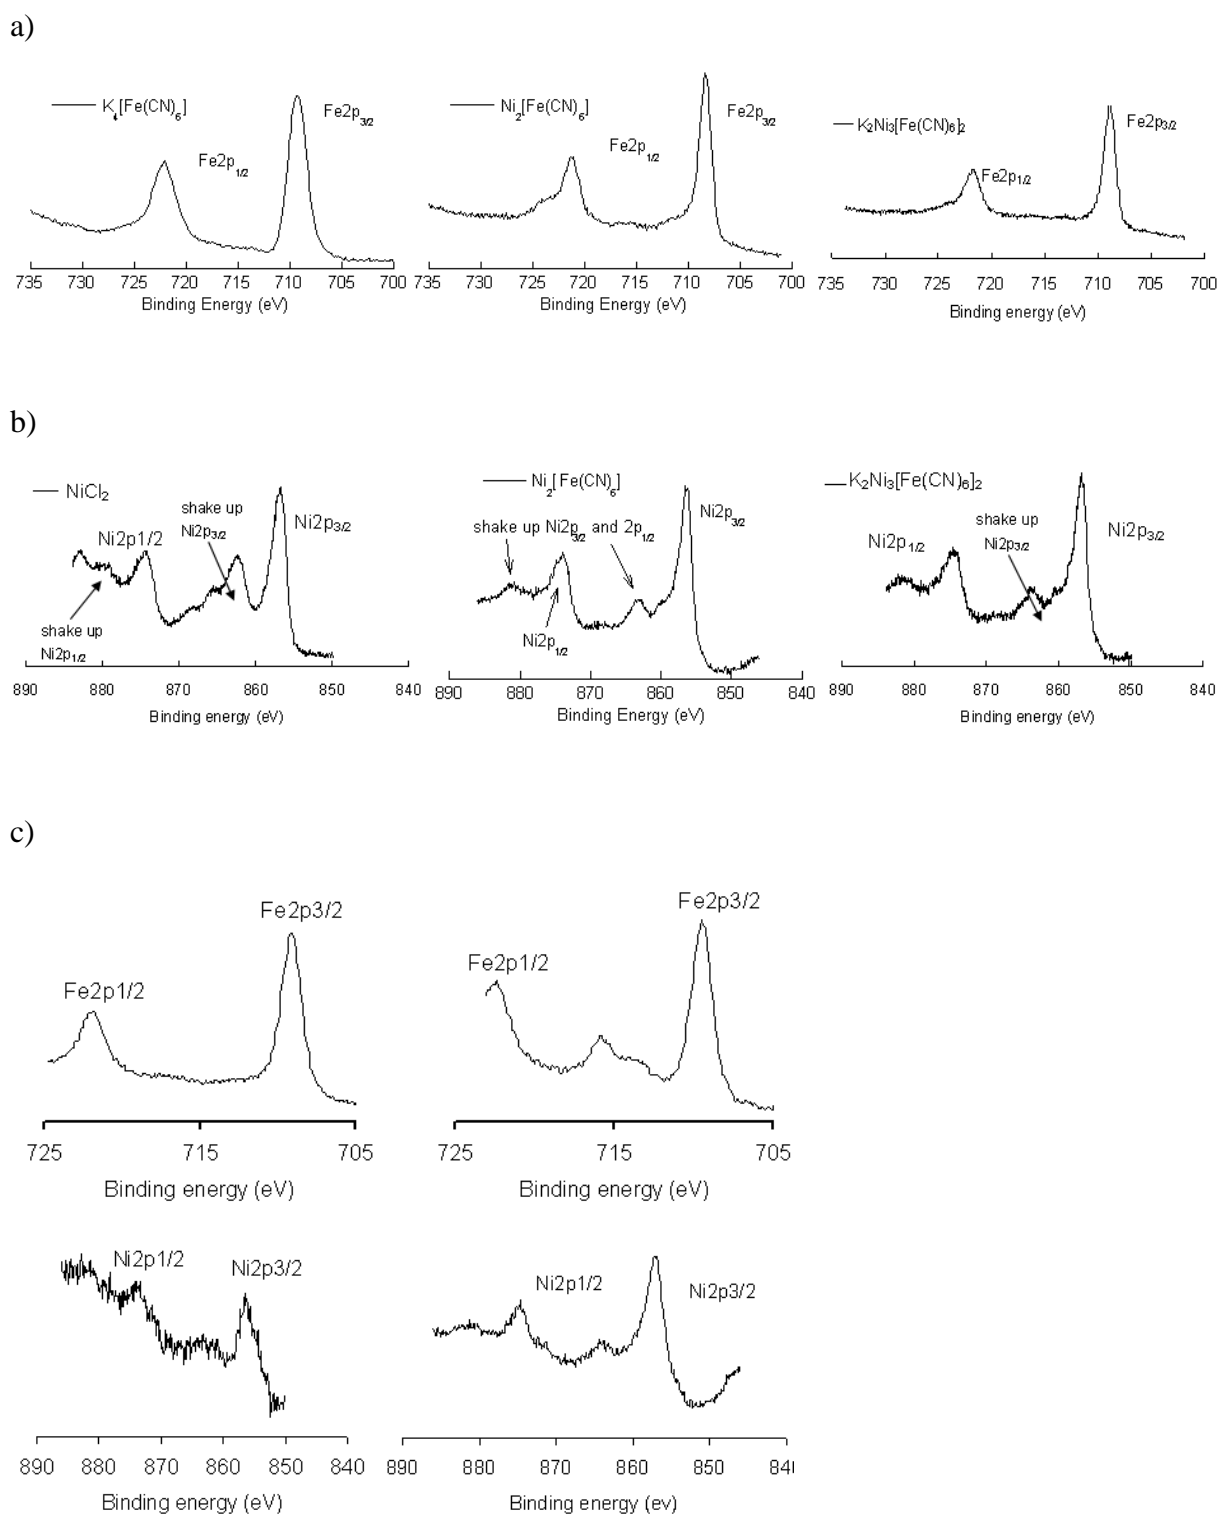

**Figure S9** XPS spectra at the Fe2p and Ni2p edges at the step *Ni/2* of NiFe growth for a concentration of the precursors in solution of  $10^{-3}$  mol.L<sup>-1</sup>.

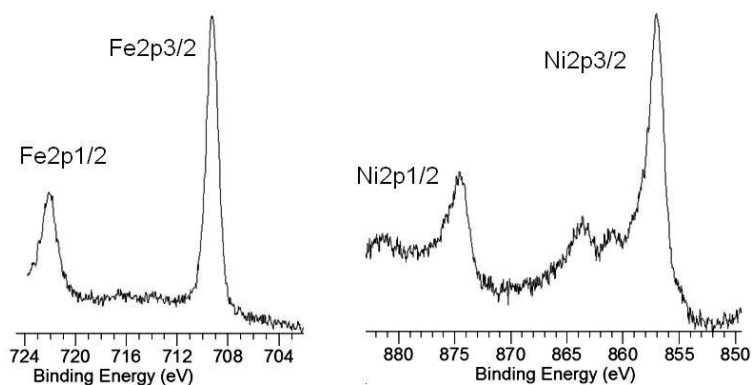

|                                                     | Fe2p <sub>1/2</sub> | Fe2p <sub>3/2</sub> | Ni2p <sub>1/2</sub> | Ni2p <sub>3/2</sub> | Ratio       |
|-----------------------------------------------------|---------------------|---------------------|---------------------|---------------------|-------------|
| Potassium Ferrocyanide                              | 722,1 eV            | 709,2 eV            | -                   | -                   | -           |
| Nickel Chloride                                     | -                   | -                   | 874,2 eV            | 856,7 eV            | -           |
| Bulk Ni <sub>2</sub> Fe                             | 721,3 eV            | 708,3 eV            | 874,1 eV            | 856,5 eV            | Fe/Ni = 0,5 |
| Bulk K <sub>2</sub> Ni <sub>3</sub> Fe <sub>2</sub> | 721,6 eV            | 708,8 eV            | 874,3 eV            | 856,8 eV            | Fe/Ni = 0,7 |
| <i>Ni/2</i> $10^{-3}$ mol.L <sup>-1</sup>           | 721,6 eV            | 708,7 eV            | 874,0 eV            | 856,5 eV            | Fe/Ni = 0,9 |



### Comparison between concentrations in solution and on the surface.

Case where there is one molecule every  $n$  nanometers on the surface.

Surface taken by one molecule:  $n \times n = n^2 \text{ nm}^2$

Surface concentration:  $S = 1 / (n^2 \text{ nm}^2) = (1/n^2) \cdot 10^{18} \text{ m}^{-2} = (1/n^2) \cdot 10^{14} \text{ cm}^{-2}$   
 $= (1/n^2) \cdot 10^{-10} \text{ mol} \cdot \text{cm}^{-2} = \mathbf{100/n^2 \text{ pmol} \cdot \text{cm}^{-2}}$

Case where there is one molecule every  $n$  nanometers in solution.

Volume taken by one molecule:  $n \times n \times n = n^3 \text{ nm}^3$

Volume concentration:  $C = 1 / (n^3 \text{ nm}^3) = (1/n^3) \cdot 10^{27} \text{ m}^{-3} = (1/n^3) \cdot 10^{24} \text{ dm}^{-3}$   
 $= (1/n^3) \cdot 10^{24} \text{ L}^{-1} = \mathbf{1/n^3 \text{ mol} \cdot \text{L}^{-1}}$

Correspondence table:

|                                                                 |           |           |
|-----------------------------------------------------------------|-----------|-----------|
| Volume concentration $C$ in $\text{mol} \cdot \text{L}^{-1}$    | $10^{-6}$ | $10^{-3}$ |
| Surface concentration $S$ in $\text{pmol} \cdot \text{cm}^{-2}$ | $10^{-2}$ | 1         |
| Intermolecular distance $n$ in nm                               | 100       | 10        |
